# Supplementary material for: Enrofloxacin and Sulfamethoxazole Sorption on Carbonized Leonardite: Kinetics, Isotherms, Influential Effects, and Antibacterial Activity toward S. aureus ATCC 25923
Source: MDPI journal article supplement (doi:10.3390/antibiotics11091261), 2022-09-16
Supplement: s1 [file s1]

Supplementary Materials

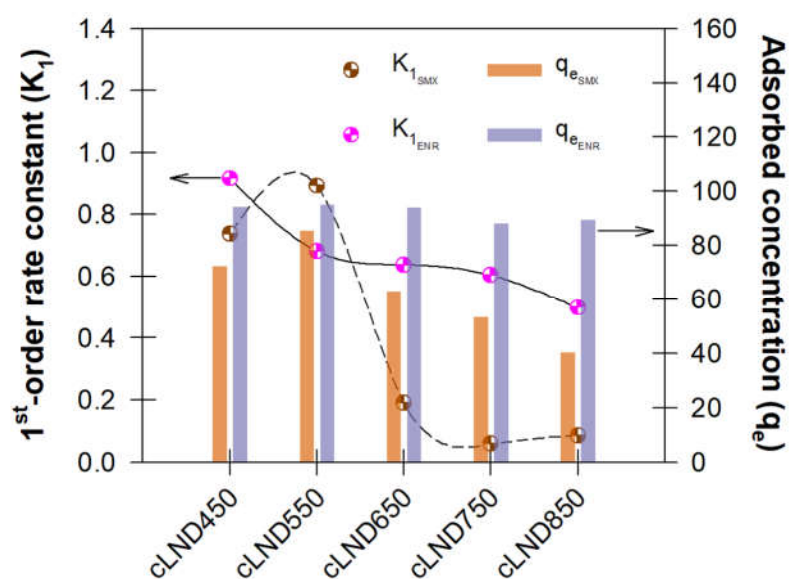

**Figure S1.** Changes in pseudo-1<sup>st</sup> order reaction rates ( $K_1$ ) and adsorbed concentrations ( $q_e$ ) following varying types of cLND adsorption.

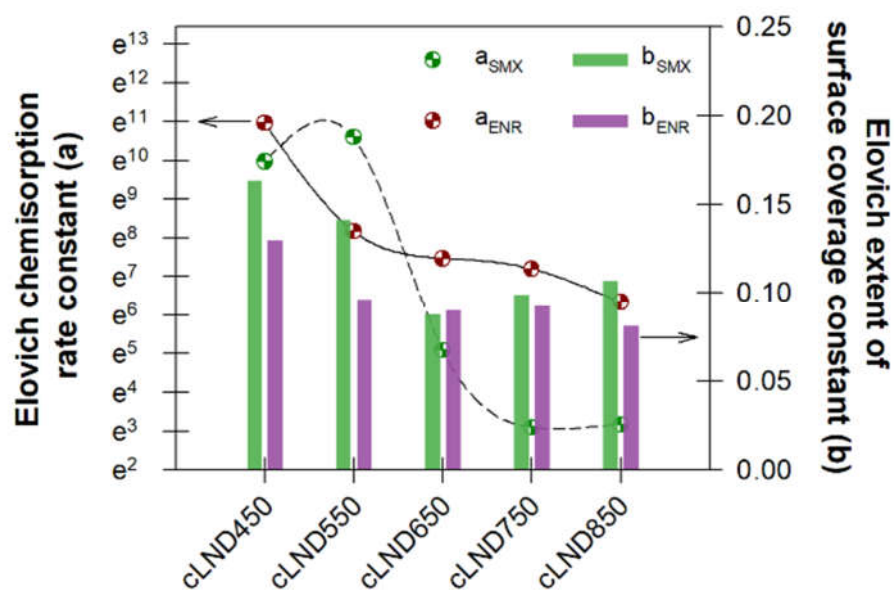

**Figure S2.** Changes in the Elovich parameters ( $a$ ,  $b$ ) following varying types of cLND adsorption.
